# Supplementary material
Source: MDPI journal article supplement (https://www.mdpi.com/2072-4292/7/10/13878)
Supplement: s1 [file s1]

# Brief introduction to HD-2000 Gamma indicator

## 1. Product exhibition

HD-2000 professional

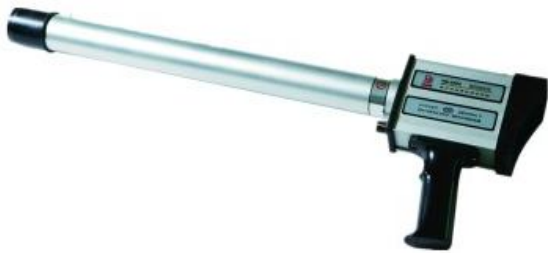

HD-2000 portable

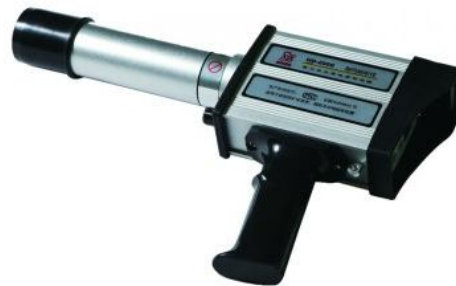

## 2. Application

HD-2000 gamma ray indicator, which measures the gamma intensity of material, can be used in uranium exploration, environmental radiation assessment and monitoring, custom inspection, and etc.

## 3. Technical parameter

### 3.1. Measuring range

| item                 | range       | unit                                 |
|----------------------|-------------|--------------------------------------|
| content              | 1 to 30000  | U $\gamma$                           |
| exposure rate        | 0.3 to 5000 | nC·kg <sup>-1</sup> ·h <sup>-1</sup> |
| absorbed dose rate   | 0.01 to 300 | $\mu$ Gy/h (in air)                  |
| dose equivalent rate | 0.01 to 360 | $\mu$ Sv/h (in air)                  |

### 3.2. Sensibility

| item          | sensibility | unit                                     |
|---------------|-------------|------------------------------------------|
| content       | $\geq 5$    | $5s^{-1}/U\gamma$                        |
| exposure rate | $\geq 30$   | $30s^{-1}/nC \cdot kg^{-1} \cdot h^{-1}$ |

### 3.3. Energy threshold

40keV

### 3.4. Instrument error

$\leq 5\%$

### 3.5. Repeatability error

$\leq 5\%$

### 3.6. Power

6V (Four 1.5V dry accumulators)

### 3.7. Energy consumption

200mW

### 3.8. Work environment

| item        | range     | unit          |
|-------------|-----------|---------------|
| temperature | -10 to 50 | °C            |
| humidity    | ≤95       | % ( at 40°C ) |

### 3.9. Size

| item         | size       | unit |
|--------------|------------|------|
| portable     | 320×50×215 | mm   |
| professional | 655×50×215 | mm   |

For more information, please refer to:

[http://www.bjhdkj.com/Mineral\\_3/product\\_20.html](http://www.bjhdkj.com/Mineral_3/product_20.html)
