# Supplementary material
Source: MDPI journal article supplement (https://www.mdpi.com/2072-4292/7/10/13878)

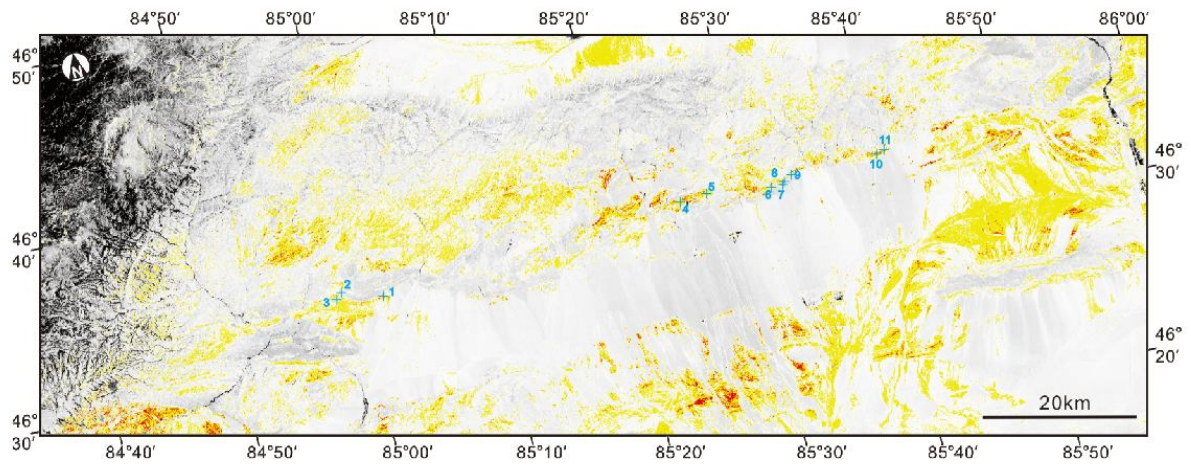

1

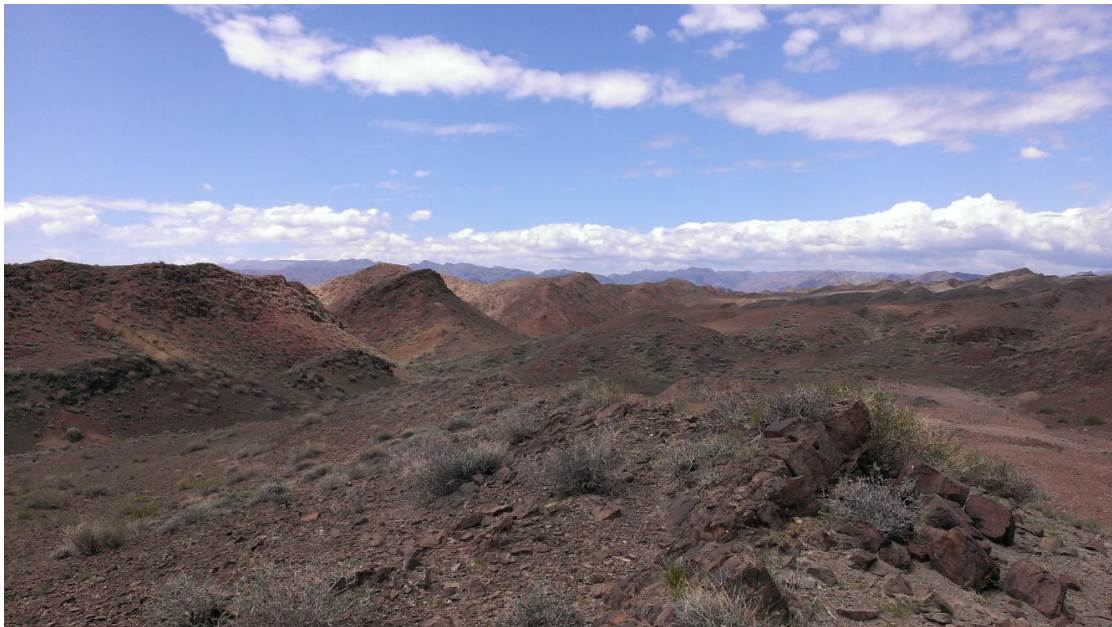

2

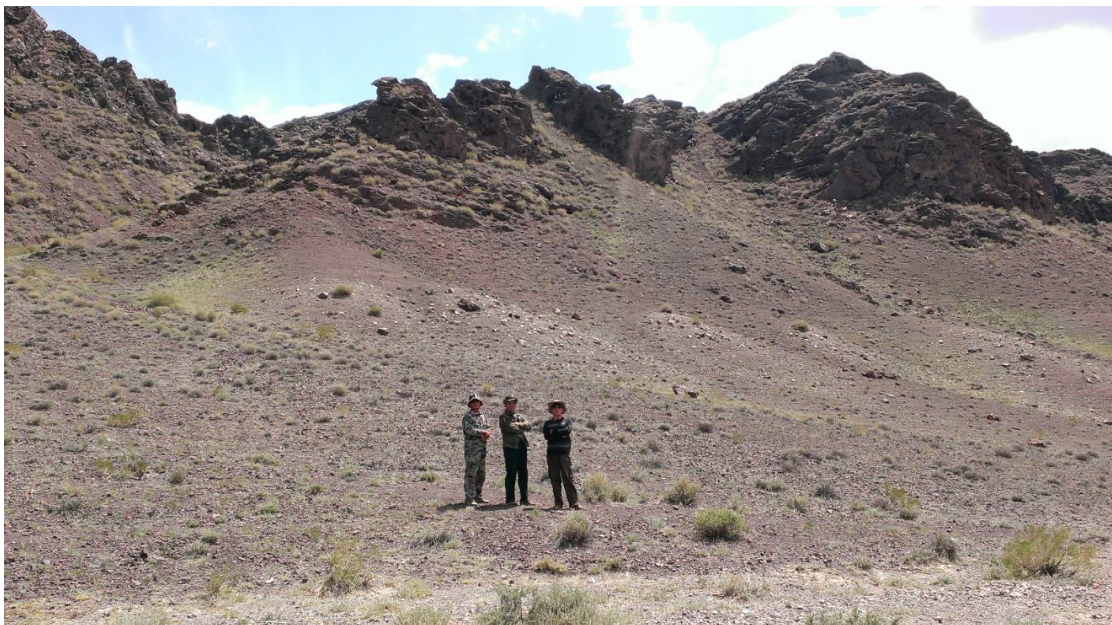



3

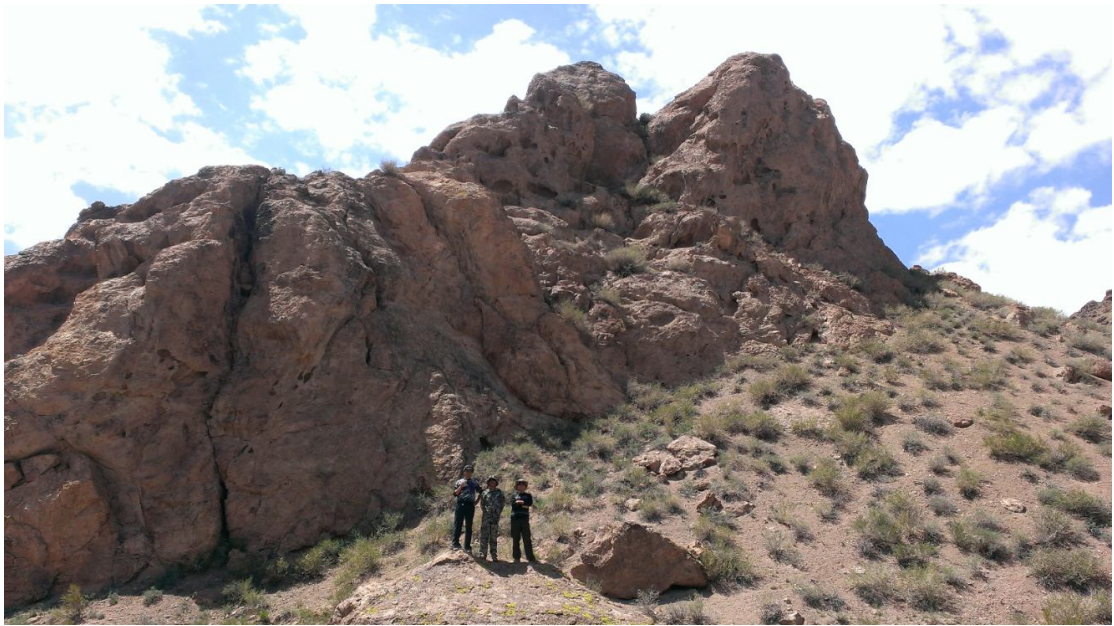

4

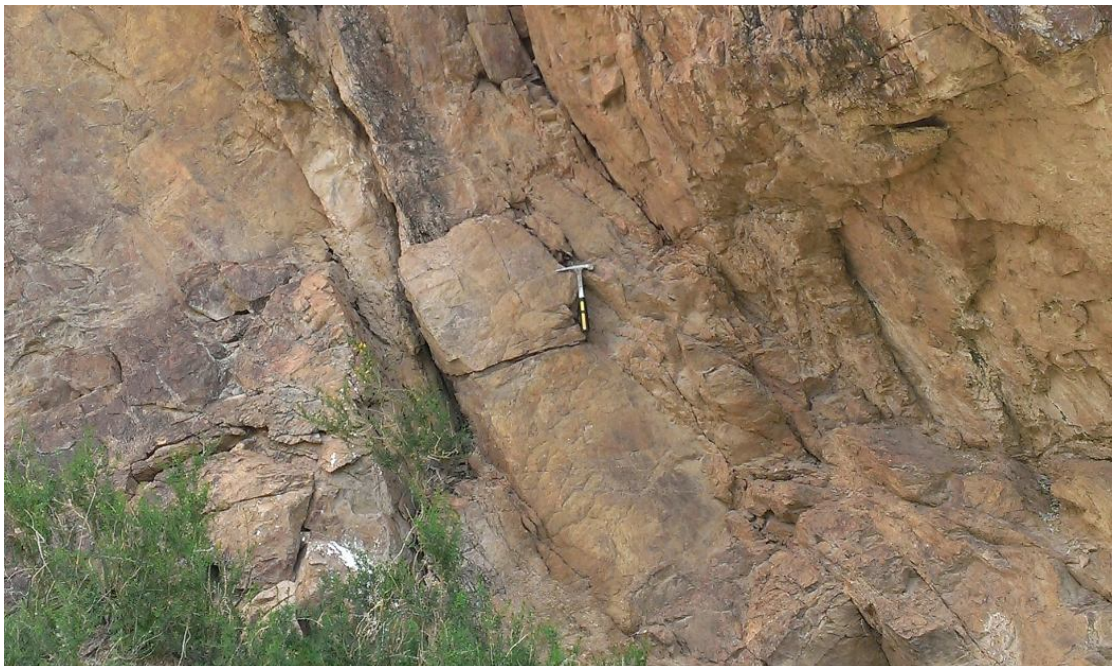



5

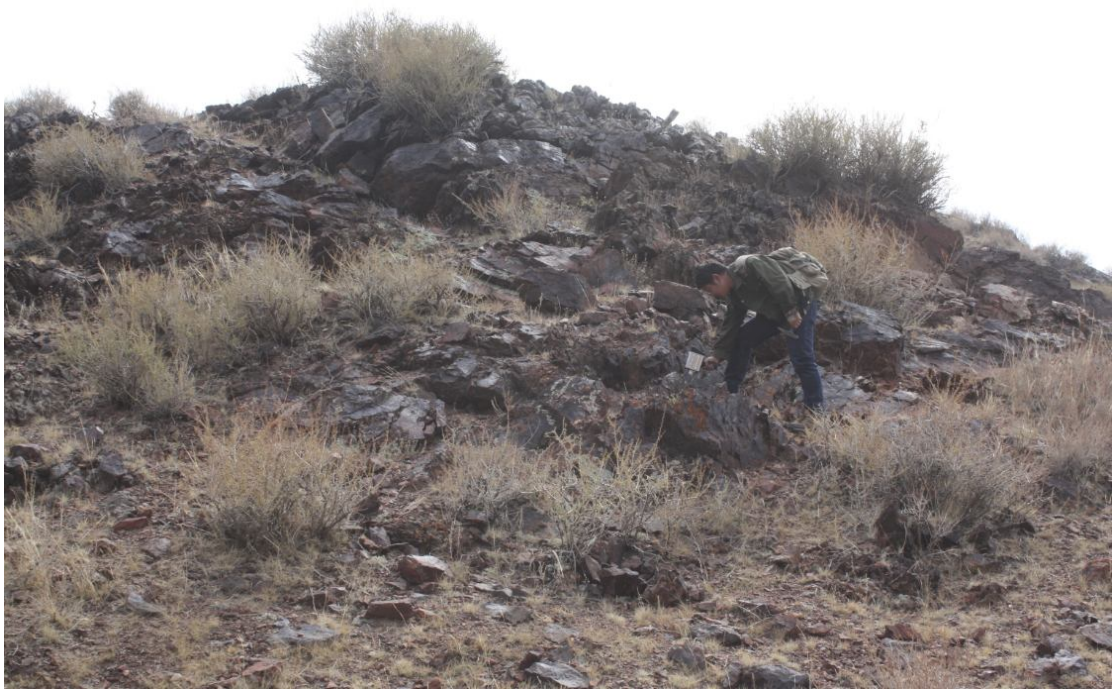

6

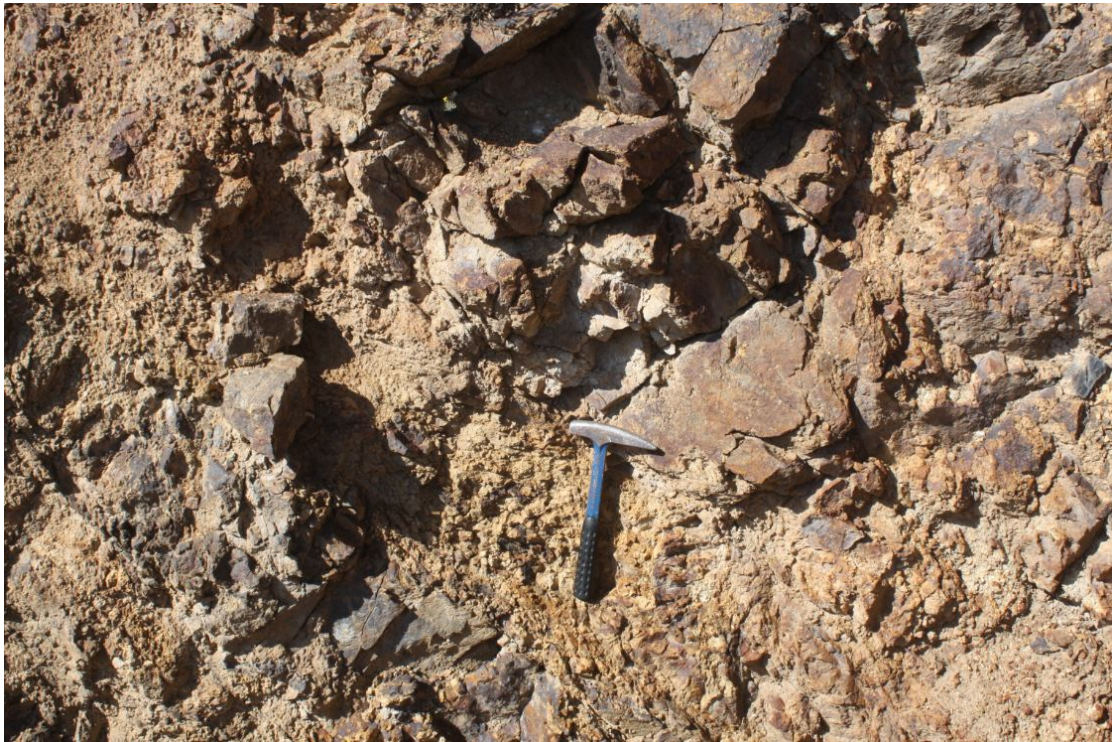



7

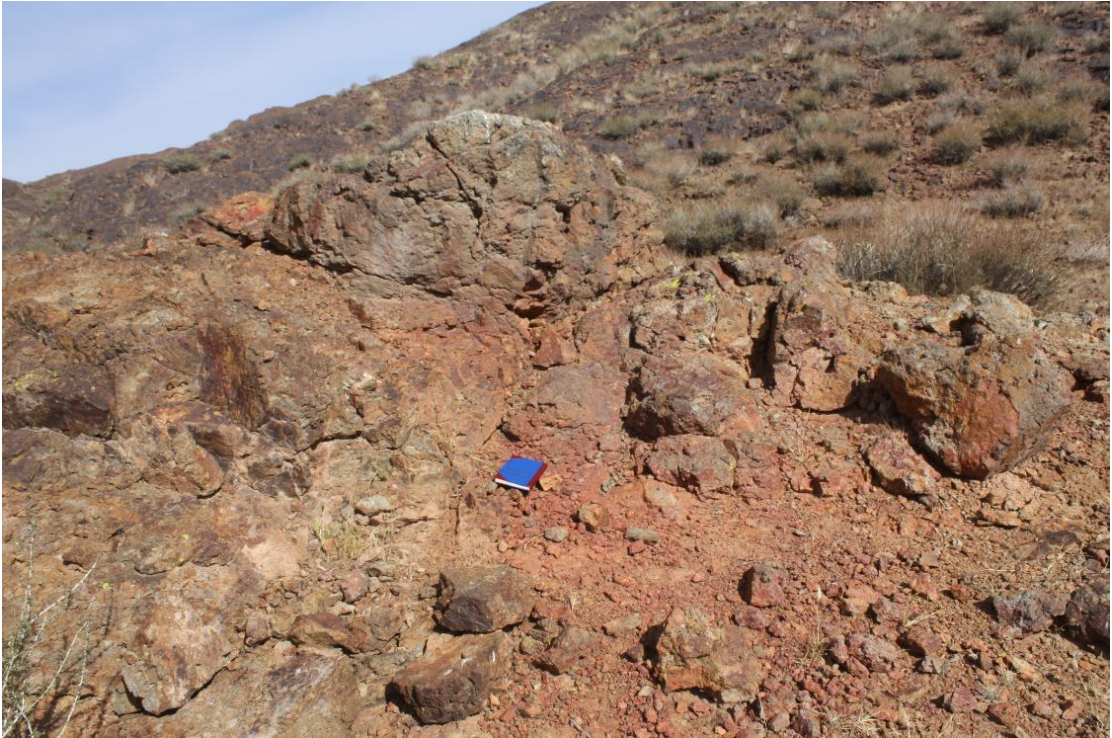

8

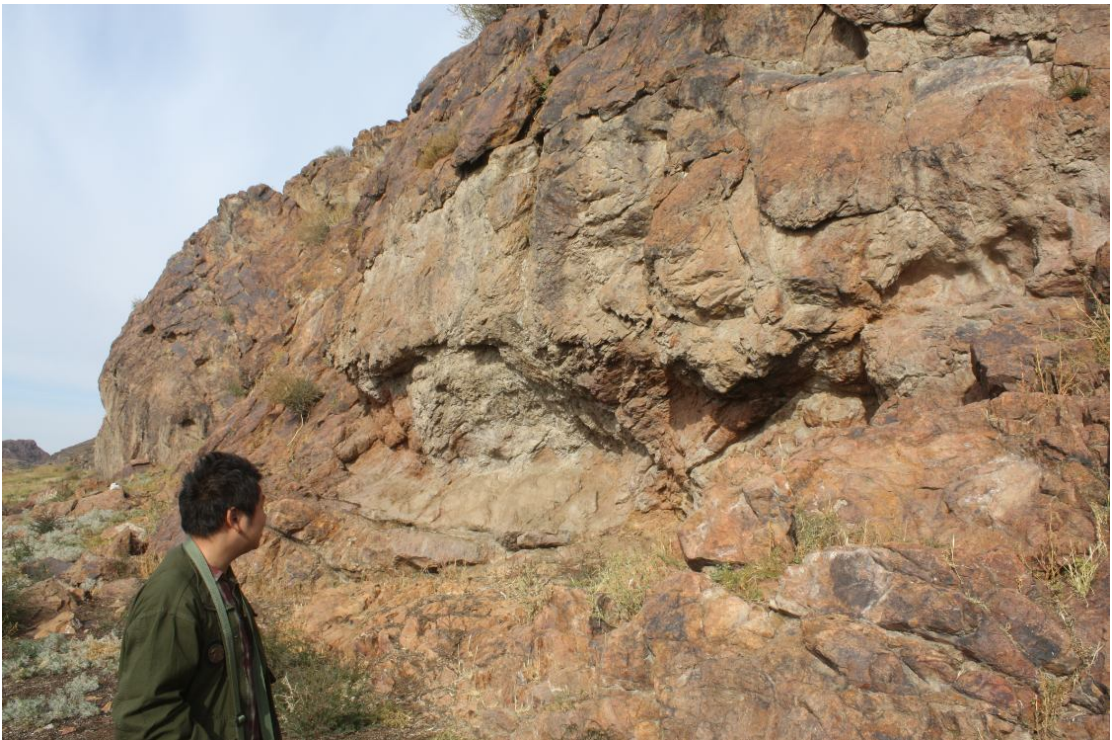



9

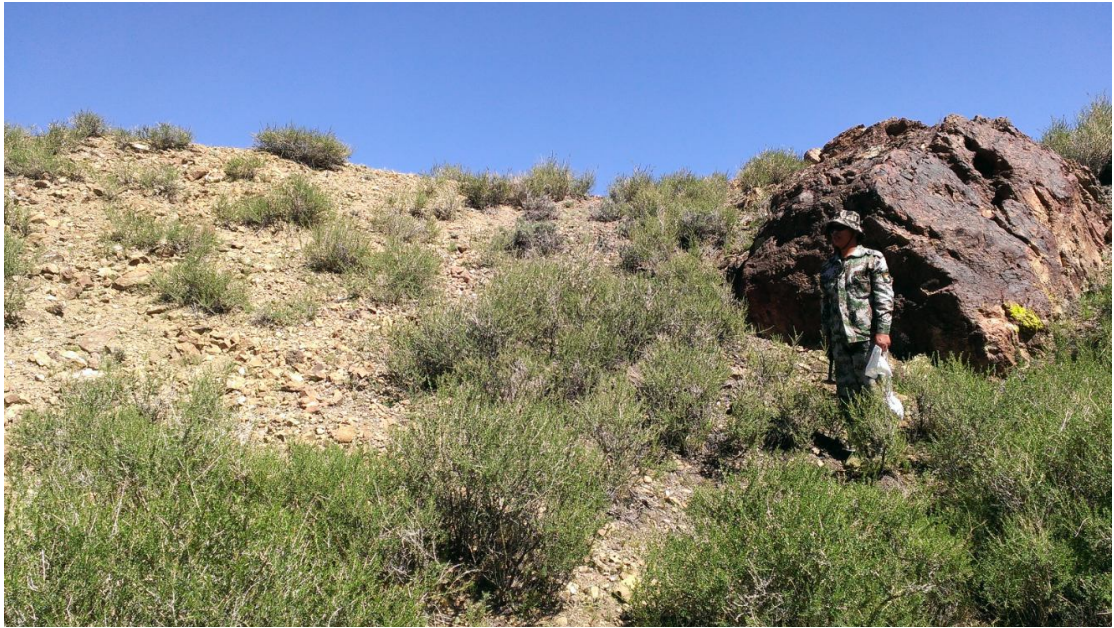

10

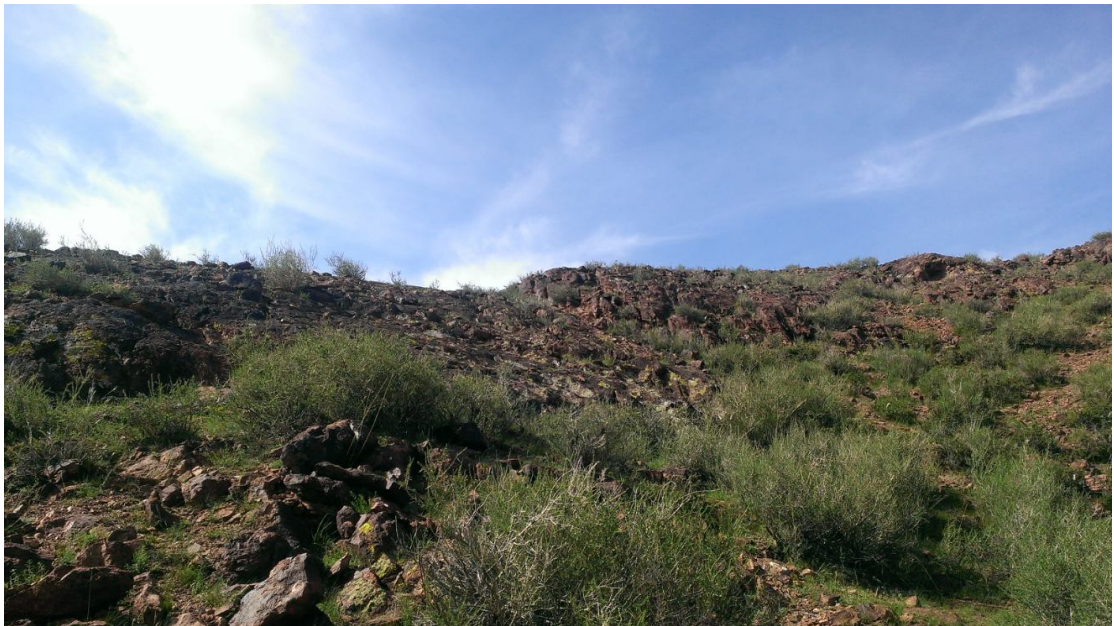

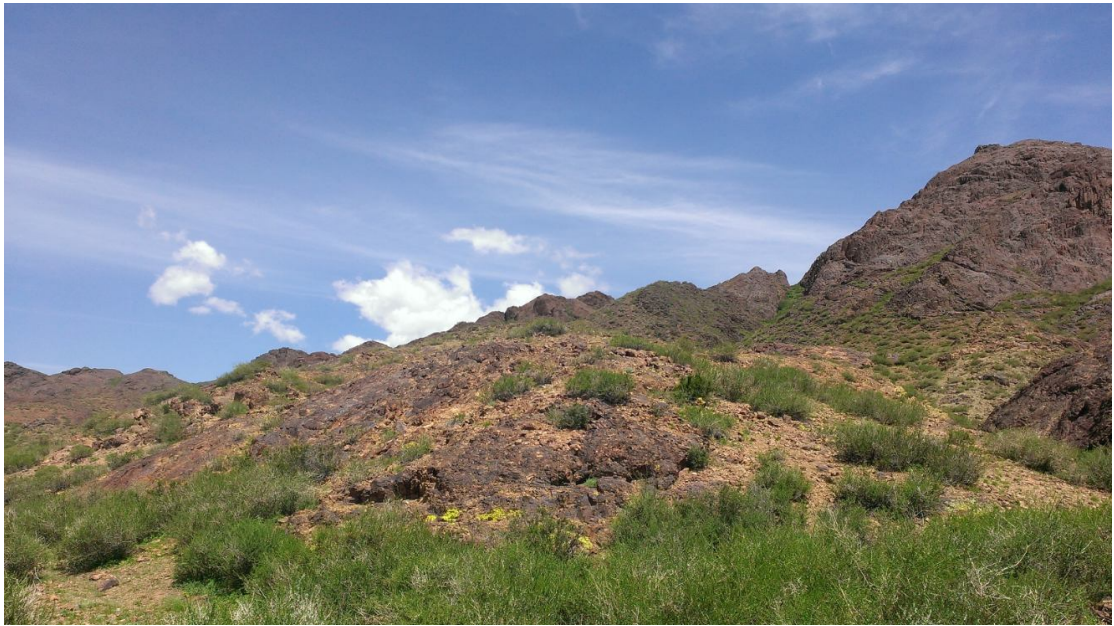

Supplement: s1 [file s1]
